# Supplementary material
Source: PubMed Central journal article supplement (PMC5465040)
Supplement: 12192_2017_794_MOESM1_ESM.pdf [file 12192_2017_794_MOESM1_ESM.pdf]

## mRNA amount of low expressed HspBs in tMCAO expressed animals

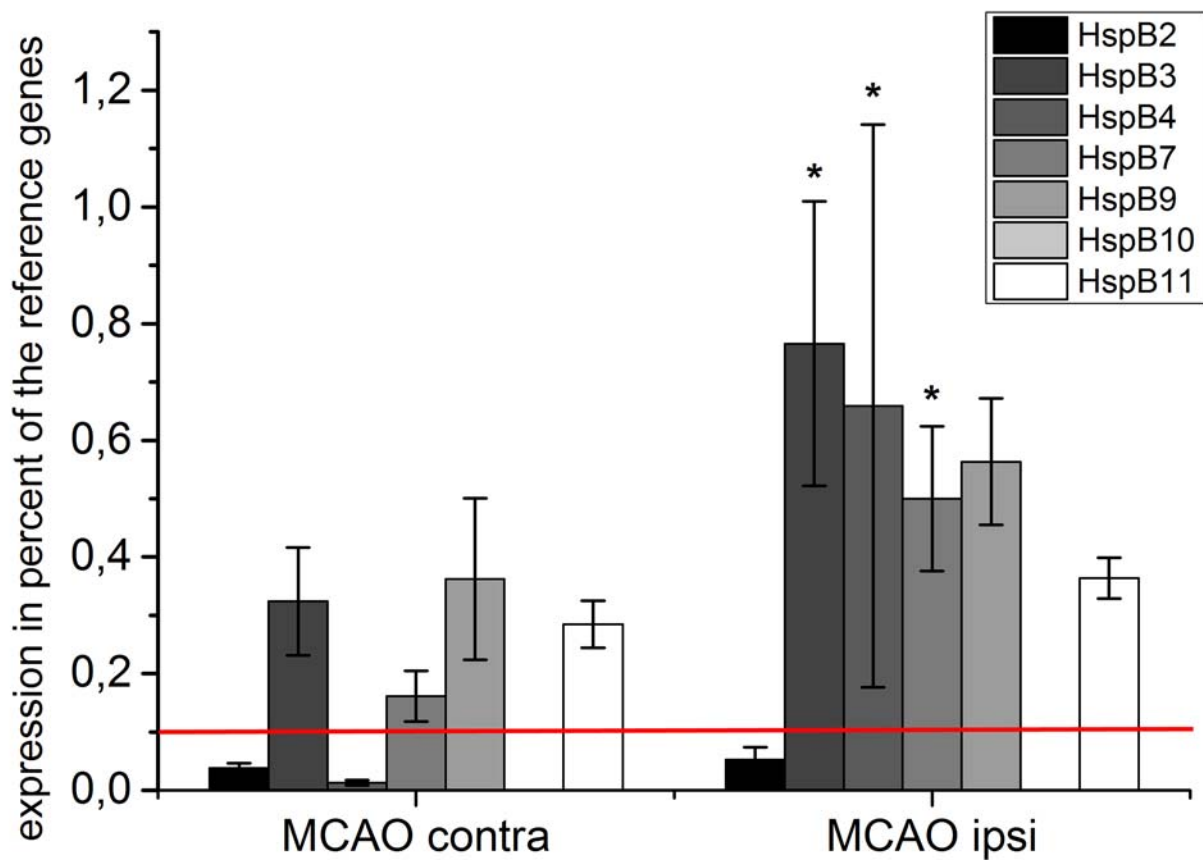

Electronic resource 1: mRNA amount of low-expressed HspBs in the peri-infarct area 24 h after tMCAO measured by real-time RT-PCR. The red line indicates the defined cut-off of expression, i.e. 0.1% of reference genes. Even though some HspBs were elevated in response to tMCAO their expression level was still rather low, namely below 1% of reference gene expression.  $n = 4$ , data are presented as mean  $\pm$  SEM. Statistical significance was assumed for  $p < 0.05$  (Mann-Whitney-U test).
