# Supplementary material
Source: PubMed Central journal article supplement (PMC5465040)
Supplement: 12192_2017_794_MOESM2_ESM.pdf [file 12192_2017_794_MOESM2_ESM.pdf]

**Electronic resource 2: HspB expression levels in sham-operated animals**

| <b>Gene</b>   | <b>contralateral</b> | <b>ipsilateral</b> |
|---------------|----------------------|--------------------|
| <b>HspB1</b>  | 1.02 ± 0.59          | 1.34 ± 0.78        |
| <b>HspB2</b>  | 0.34 ± 0.08          | 0.28 ± 0.07        |
| <b>HspB3</b>  | 0.64 ± 0.28          | 0.88 ± 0.42        |
| <b>HspB4</b>  | n.e.                 | n.e.               |
| <b>HspB5</b>  | 6.74 ± 0.66          | 6,24 ± 0.60        |
| <b>HspB6</b>  | 12.41 ± 0.65         | 11.42 ± 1.34       |
| <b>HspB7</b>  | 0.50 ± 0.11          | 0.40 ± 0.15        |
| <b>HspB8</b>  | 3.26 ± 1.06          | 2.59 ± 0.58        |
| <b>HspB9</b>  | 0.52 ± 0.04          | 0.44 ± 0.11        |
| <b>HspB10</b> | n.e.                 | n.e.               |
| <b>HspB11</b> | 0.74 ± 0.14          | 0,68 ± 0.10        |
|               |                      |                    |
| <b>Hsp70i</b> | 4.97 ± 0.95          | 6.70 ± 2.21        |

Electronic resource 2: mRNA amount of HspBs in sham-operated animals measured by real-time RT-PCR, presented in percent of reference gene expression. n=4, data presented as arithmetic mean ± SEM. n.e. not expressed.
