# Supplementary material
Source: PubMed Central journal article supplement (PMC5465040)
Supplement: 12192_2017_794_MOESM3_ESM.pdf [file 12192_2017_794_MOESM3_ESM.pdf]

**Electronic resource 3: Protein amount of HspBs relative to contralateral side in sham-operated animals**

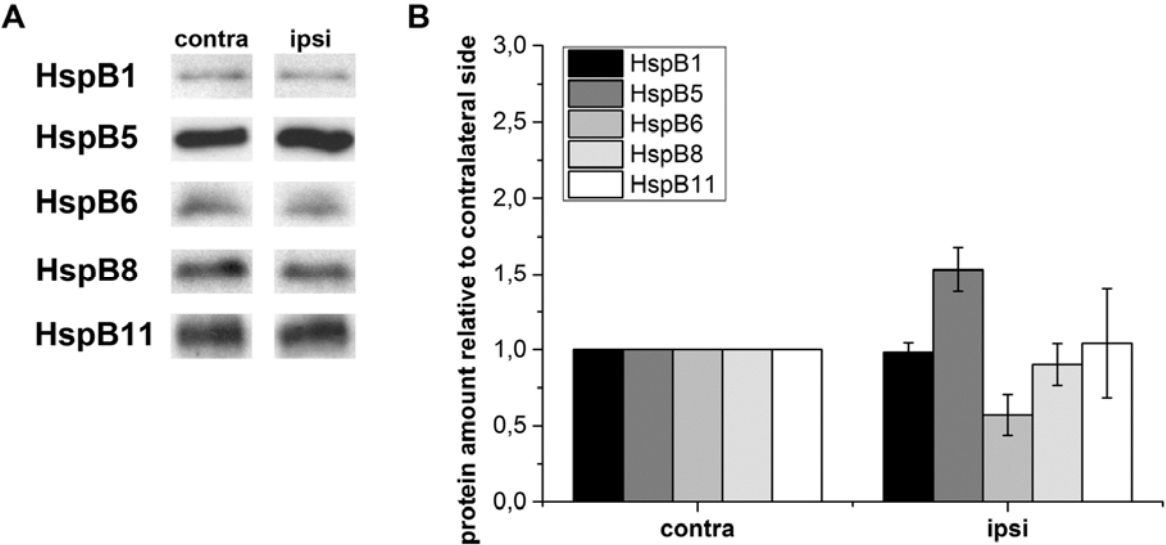

(A) Representative western blots and (B) densitometric analysis of western blots normalized first to GAPDH and subsequently to the contralateral side. n=3; data presented as mean  $\pm$  SEM.
